# Supplementary material for: The pearl oyster Pinctada fucata martensii genome and multi-omic analyses provide insights into biomineralization
Source: PubMed Central journal article supplement (PMC5597905; doi:10.1093/gigascience/gix059), 2017-07-25
Supplement: gix059_GIGA-D-16-00075_Revision-3.pdf [file gix059_GIGA-D-16-00075_Revision-3.pdf]

1  
2 **The pearl oyster *Pinctada fucata martensii* genome and multi-omic analyses**  
3 **provide insights into biomineralization**  
4

5 Xiaodong Du<sup>a,\*,#</sup>, Guangyi Fan<sup>b,g\*</sup>, Yu Jiao<sup>a,\*</sup>, He Zhang<sup>g,\*</sup>, Ximing Guo<sup>c,\*,#</sup>, Ronglian  
6 Huang<sup>a,\*</sup>, Zhe Zheng<sup>a,\*</sup>, Chao Bian<sup>g</sup>, Yuewen Deng<sup>a</sup>, Qingheng Wang<sup>a</sup>, Zhongduo  
7 Wang<sup>a</sup>, Xinming Liang<sup>g</sup>, Haiying Liang<sup>a</sup>, Chengcheng Shi<sup>g</sup>, Xiaoxia Zhao<sup>a</sup>, Fengming  
8 Sun<sup>g</sup>, Ruijuan Hao<sup>a</sup>, Jie Bai<sup>g</sup>, Jialiang Liu<sup>a</sup>, Wenbin Chen<sup>g</sup>, Jinlian Liang<sup>a</sup>, Weiqing  
9 Liu<sup>g</sup>, Zhe Xu<sup>e</sup>, Qiong Shi<sup>g</sup>, Xun Xu<sup>g</sup>, Guofan Zhang<sup>d,f,#</sup>, Xin Liu<sup>g,#</sup>  
10  
11  
12  
13  
14  
15

16 \*These authors contributed equally.

17 #Corresponding authors: X.D. (zjduxd@126.com), X.G. (xguo@hsrl.rutgers.edu),  
18 G.Z. (gzhang@qdio.ac.cn) and X.L. (liuxin@genomics.cn).  
19  
20  
21  
22

23 <sup>a</sup>Fishery College, Guangdong Ocean University, Zhanjiang, 524025, China;

24 <sup>b</sup>BGI-Qingdao, Qingdao 266555, China

25 <sup>c</sup>Haskin Shellfish Research Laboratory, Department of Marine and Coastal Sciences,  
26 Rutgers University, Port Norris, New Jersey 08349, USA;

27 <sup>d</sup>Key Laboratory of Experimental Marine Biology, Institute of Oceanology, Chinese  
28 Academy of Sciences, Qingdao, China;

29 <sup>e</sup>Atlantic Cape Community College, Mays Landing, New Jersey 08330, USA;

30 <sup>f</sup>Laboratory for Marine Biology and Biotechnology, Qingdao National Laboratory for  
31 Marine Science and Technology, Qingdao, China  
32  
33

34 <sup>g</sup>BGI-Shenzhen, Shenzhen, 518083 China;  
35  
36  
37  
38  
39  
40  
41  
42  
43  
44  
45  
46  
47  
48  
49  
50  
51  
52  
53  
54  
55  
56  
57  
58  
59  
60  
61  
62  
63  
64  
65

1  
2 **Abstract**

3 **Background:** Nacre, the iridescent material found in pearls and shells of molluscs, is  
4 formed through an extraordinary process of matrix-assisted biomineralization. Despite  
5 recent advances, many parts of the biomineralization process and its evolutionary  
6 origin remain a mystery. The pearl oyster *Pinctada fucata martensii* is a well-known  
7 master of biomineralization, but the molecular mechanisms underlie its production of  
8 remarkable shells and pearls is not fully understood.

9 **Results:** We sequenced the highly polymorphic genome of the pearl oyster and  
10 conducted multi-omic and biochemical studies to probe nacre formation. We  
11 identified a large set of novel proteins participating in matrix-framework formation,  
12 many in expanded families, including components similar to that found in vertebrate  
13 bones such as collagen-related VWA-containing proteins (VWAP), chondroitin  
14 sulfotransferases and regulatory elements.

15 **Conclusions:** Considering that there are only collagen-based matrices in vertebrate  
16 bones and chitin-based matrices in most invertebrate skeletons, the presence of both  
17 chitin and elements of collagen-based matrices in nacre matrices suggests that  
18 elements of chitin- and collagen-based matrices are deeply rooted and might be part  
19 of an ancient biomineralizing matrix. Our results expand the current shell  
20 matrix-framework model and provide new insights into the evolution of diverse  
21 biomineralization systems.

22 **Keywords:** genome, biomineralization, nacre, VWA-containing protein, *Pinctada*  
23 *fucata martensii*

24  
25  
26  
27  
28  
29  
30  
31  
32  
33  
34  
35  
36  
37  
38  
39  
40  
41  
42  
43  
44  
45 **Background**

46 Biomineralization is an extraordinary process where minerals form not following  
47 rules of inorganic chemistry but through active biological facilitation and control.  
48 Biomineralization is widely distributed and essential to the lives of diverse organisms,  
49 ranging from algae to vertebrates that rely on mineralized materials for morphology,  
50 structure, protection, movement and feeding. Three principal classes of skeletal  
51 biominerals exist on earth: calcium carbonate, calcium phosphate and silica [1].  
52 Whether these skeletal biominerals evolved independently or derived from a common  
53 origin is controversial, although current thinking favours independent evolution [2].  
54  
55  
56  
57  
58  
59  
60  
61  
62  
63  
64  
65

1 One of the remarkable characteristics of biomineralization is its precise control by  
2 organic matrices [3]. Organic matrices are complex and variable but can be classified  
3 into two basic and highly conserved types that use either chitin or collagen as the  
4 templating framework [3]. Despite great interest in harnessing the power of  
5 biomineralization for the production of novel materials, our understanding of  
6 biomineralization and associated matrices is limited in many taxa, including the  
7 well-known masters of biomineralization - shelled molluscs.  
8  
9

10 Nacre is the remarkable biomineral found in pearls and shells of molluscs that  
11 provides lustre and enhanced toughness. The formation of lustrous pearls and shells in  
12 molluscs such as the pearl oyster *Pinctada fucata martensii* has long fascinated  
13 humans. The biomineralization process of nacre formation is complex and involves  
14 sophisticated organic matrices as well as cells, many aspects of which remain elusive  
15 [4-8]. The origin and homology of nacre formation with other biomineralization  
16 processes such as crustacean shell and vertebrate bone formation is not understood [9].  
17 Studies of biomineralization and other fundamental questions in biology and  
18 evolution can be greatly empowered by whole genome analyses, which have been  
19 difficult in molluscs owing to challenges in assembling their highly polymorphic and  
20 complex genomes [6, 10]. To understand the biomineralization process of nacre, we  
21 sequenced and assembled the *P. f. martensii* genome and generated transcriptomes  
22 from 11 organs/tissues and 12 developmental stages, along with the proteomes of  
23 shell organic matrices.  
24  
25  
26  
27  
28  
29  
30  
31  
32  
33  
34  
35  
36  
37  
38  
39

#### 40 **Data description**

41 We used a pearl oyster from a third-generation line selected for fast growth for  
42 sequencing and assembly using a BAC-to-BAC strategy. In addition to BAC  
43 sequencing, we also constructed whole genome shotgun (WGS) libraries including 3  
44 with short insert-sizes and 4 with long insert-sizes. We used a draft assembly from a  
45 previous study [10], Sanger-sequenced BACs and transcripts generated by RNA-seq  
46 to assess the integrity of our assembly. Furthermore, to anchor scaffolds to  
47 chromosomes, we constructed a genetic map using restriction-site associated DNA  
48 sequencing (RAD-seq) using 148 F1 offspring obtained by crossing two genetically  
49 distant parents.  
50  
51  
52  
53  
54  
55  
56  
57

58 To determine gene expression profile in different organs or tissues, we performed  
59 transcriptome sequencing on eleven organs and tissues, including adductor muscle,  
60  
61  
62  
63  
64  
65

1 mantle, mantle pallium, mantle edge, hepatopancreas, hemocyte, gonad, gill, foot, and  
2 pearl sac at 180 days (d) after nucleus transplantation. Further, we performed  
3 transcriptome sequencing on 12 developmental samples to determine gene expression  
4 profile during development. Developmental samples included unfertilized eggs, 11  
5 samples obtained at 30 min, 5 h, 6 h, 8 h, 16 h, 19 h, 4 d, 14 d, 28 d, 40 d, and 90 d  
6 after fertilization. To understand gene regulation during nacre formation, we analyzed  
7 transcriptome data from mantle edge, mantle pallial and two entire mantle tissues  
8 representing fast and slow growing pearl oysters with WGCNA (weighted-gene  
9 co-expression network analysis), and obtained co-expression network patterns. All  
10 sequencing and genome data were uploaded to GigaDB under the accession number  
11 BioProject:PRJNA283019.  
12  
13  
14  
15  
16  
17  
18  
19  
20  
21

## 22 **Results**

23 **Genome assembly and characterization.** As our initial assembly of ~130 Gb  
24 (134-fold coverage) of whole-genome shotgun (WGS) Illumina sequences (Additional  
25 file 1: Table S1) was too fragmented for annotation and analysis, probably due to high  
26 polymorphism and repetitive sequences (Additional file 2: Figure S1a and b), we  
27 subsequently adopted a BAC-to-BAC (bacterial artificial chromosome) sequencing  
28 strategy [6, 11]. We sequenced 46,080 BACs (5-fold genome coverage) to a depth of  
29 100X using Illumina next-generation sequencing (NGS), assembled each BAC  
30 separately (Additional file 2: Figure S1c), and then built supercontigs after merging  
31 and filtering redundant sequences. After constructing scaffolds and filling gaps with  
32 WGS reads, we obtained a final assembly of 990,658,107 bp with a contig N50 size of  
33 21 kb and a scaffold N50 of 324 kb (Additional file 1: Table S2), which was a  
34 significant improvement compared with the contig N50 of 1.6 kb of the previous draft  
35 assembly [10].  
36  
37  
38  
39  
40  
41  
42  
43  
44  
45  
46

47 The coverage of our assembly was demonstrated by the successful mapping of  
48 90.5% of contigs, 95.5% (coverage  $\geq 50\%$ ) of gene-model regions of the previous  
49 draft assembly [10], 99.8% of transcripts (coverage  $\geq 50\%$ ), and all four BACs  
50 (coverage  $\geq 93.2\%$ ) sequenced with Sanger technology (Additional file 1: Table S3  
51 and S4; Additional file 3: Figure S2). We constructed a high-density genetic map of  
52 14 linkage groups in accordance with the haploid number, using RAD-seq of a full-sib  
53 family (Fig. 1). We were able to anchor 857.07 Mb (86.5%) scaffolds to the genetic  
54 map with 4,463 single-nucleotide polymorphisms (SNPs) (Additional file 1: Table S5;  
55  
56  
57  
58  
59  
60  
61  
62  
63  
64  
65

1 Fig. 1b). Through alignment of our pseudochromosomes to that of *Crassostrea gigas*,  
2 we identified 2,240 syntenic blocks and several possible chromosome rearrangements  
3 (Fig. 1c).  
4

5 Combining *de novo* prediction and evidence-based annotation using published  
6 data and transcriptomes from 11 organs/tissues and 12 developmental stages  
7 (Additional file 1: Table S6), we identified 32,937 protein-coding gene models  
8 (Additional file 1: Table S7), which is comparable to the gene numbers found in  
9 *Capitella teleta* (32,389) and *C. gigas* (28,027) but higher than those in *Drosophila*  
10 *melanogaster* (23,847), *Helobdella robusta* (23,400) and *Lottia gigantea* (23,800).  
11 Searches against public databases showed that 84.0% of the gene models matched  
12 known proteins (Additional file 1: Table S8). Further, BUSCO analysis shows that  
13 82.8% of predicted genes are completed and 7.4% of them are fragmented, indicating  
14 our assembly is adequate for further analysis. To assess the impact of selection, we  
15 determined codon usage, GC content of intron, exon and inter-genic regions, and GC  
16 content at each codon position, which were similar in *P. f. martensii* and other 8  
17 species (Additional file 4: Figure S3).  
18  
19

20 Phylogenetic analysis of the sequenced genomes of *P. f. martensii*, *C. gigas* and *L.*  
21 *gigantea* along with selected model organisms provided estimates of divergence times:  
22 485 million years ago (mya) between *P. f. martensii* (Bivalvia) and *L. gigantea*  
23 (Gastropoda) and 316 mya between *P. f. martensii* (Pteriidae) and *C. gigas* (Ostreidae)  
24 (Additional file 5: Figure S4). These estimates are in agreement with the most  
25 up-to-date phylogenetic analyses of molluscan evolution [12]. Compared to *Homo*  
26 *sapiens* and *Danio rerio*, molluscan genomes do not have transforming growth factor  
27 (TGF)-beta factors but only bone morphogenetic proteins (BMPs), but these two  
28 proteins share a common origin with TGF-beta being derived from BMPs (Additional  
29 file 1: Table S10, S11 and S12; Additional file 6: Figure S5). TGF-beta factors are  
30 crucial in regulating osteoblast proliferation, differentiation and bone matrix  
31 maturation in vertebrates [13, 14]. This finding suggests that molluscs have  
32 maintained an ancient BMP-regulatory system for shell formation [15], while  
33 TGF-beta emerged in vertebrates to regulate bone matrix.  
34  
35

36 **Chitin is a basic component of the nacre matrix.** Consistent with the matrix model  
37 of molluscan shell formation, we demonstrated the abundant presence of chitin in the  
38 shell matrix of *P. f. martensii* (in both prismatic and nacreous layers) and *C. gigas*  
39 (mostly prismatic) by Calcofluor white M2R staining (Additional file 7: Figure S6a).  
40  
41  
42  
43  
44  
45  
46  
47  
48  
49  
50  
51  
52  
53  
54  
55  
56  
57  
58  
59  
60  
61  
62  
63  
64  
65

1 Transcriptome analysis of different tissues indicated that some *chitin synthases* (*CHSs*)  
2 and *chitinase* were highly expressed in the mantle and pearl sac, the two main  
3 calcifying tissues responsible for shell and pearl formation (Additional file7: Figure  
4 S6b and S6c). During larval development, some *CHSs* and *chitinases* were highly  
5 expressed at the trochophore and post-veliger stages (Additional file 7: Figure S6d),  
6 corresponding to prodissoconch and dissoconch/adult shell formation, respectively.  
7 Furthermore, the gene family of *CHS* was significantly expanded in *P. f. martensii* and  
8 other shelled molluscs, but not in molluscs without shells, *Octopus bimaculoides*  
9 (Additional file 1: Table S10). These results suggest that chitin is a key component of  
10 the shell matrix, and *CHS* genes in *P. f. martensii* and other shelled molluscs might  
11 have played crucial roles in the evolution of advanced shells in molluscs.  
12  
13  
14  
15  
16  
17  
18  
19

20 **The presence and involvement of VWA containing proteins (VWAP).** According  
21 to the current model, silk proteins are major components of the organic matrix in  
22 molluscan shells. We searched for silk proteins in the *P. f. martensii* genome and the  
23 proteome of the shell matrix but found none. Interestingly, a total of 10 VWAPs were  
24 detected in the nacre proteome with 372 unique spectra, compared with 146 spectra in  
25 the prismatic layer proteome (Additional file 8: Datasets S1). Among the 10 VWAPs,  
26 8 VWAPs specifically existed in the nacre and not found in the prismatic layer  
27 proteome, and 8 VWAPs contained VWA domains that show highest sequence  
28 homology with VWA domains of human or mouse collagens (Additional file 1: Table  
29 S13). Corresponding to the abundance of VWAPs in the nacre proteome, the *P. f.*  
30 *martensii* genome has an expanded family of 164 VWAPs, similar to the 162 found in  
31 *C. gigas* [6] but more than the 94 found in *L. gigantea* and 91 in humans (Fig. 2a).  
32 The 10 VWAPs were highly expressed in the mantle pallium and pearl sac, which are  
33 responsible for nacreous layer production (Fig. 2b). All 10 VWAPs were up-regulated  
34 (at least 5X of the level in egg) in post-veliger larvae with nacreous/aragonite shells,  
35 again suggesting their crucial role in nacreous matrix formation. Meanwhile, two of  
36 the 10 VWAPs (Pma\_10019835, Pma\_10011421) was significantly up-regulated (40X  
37 of egg) at the trochophore stage, in correlation with aragonite shell formation (Fig. 2c).  
38 After inhibition of six VWAPs (Pma\_44.534, Pma\_530.149, Pma\_10011175,  
39 Pma\_10019835, Pma\_10019836, Pma\_10015641) by RNA interference, the  
40 microstructure of the nacre showed disordered growth, as observed by scanning  
41 electron microscopy (SEM) (Fig. 2d and Additional file 9: Figure S7). These results  
42 suggest that VWAPs are a major component of the nacreous organic matrix and play a  
43  
44  
45  
46  
47  
48  
49  
50  
51  
52  
53  
54  
55  
56  
57  
58  
59  
60  
61  
62  
63  
64  
65

1 key role in nacreous shell formation in *P. f. martensii*. Structure analysis indicated  
2 two of the 10 VWAPs (Pma\_10015641 and Pma\_10011421) has a chitin-binding  
3 domain, supporting its possible function in interacting with the chitin framework  
4 during matrix formation. Surprisingly, there are no collagens containing both VWA  
5 and triple helix repeat (THRs) in genomes of the three molluscs analyzed (*P. f.*  
6 *martensii*, *C. gigas* and *L. gigantea*). Collagens with VWA and THR are found in  
7 some invertebrates (*C. teleta*, *H. robusta* and *Mytilus coruscus* [16]) (Additional file  
8 10: Figure S8), suggesting that THRs may be lost in some lineages. THR containing  
9 genes showed contraction in the mollusc genomes, over expansion in annulata and  
10 vertebrates (Fig. 2a).

11 **Acidic glycosaminoglycans (GAGs) constitute a gel-like substance.** According to  
12 the matrix model, the shell matrix contains a gel-like substance where acidic proteins  
13 induce the nucleation of calcium carbonate crystals [17]. Consistent with the model  
14 and previous reports, we identified a list of acid proteins that might be involved in  
15 shell formation (Additional file 8: Datasets S2). In addition to the acidic proteins that  
16 are unique to molluscan shells, we also found acidic GAGs, fibronectin-like proteins  
17 and chondroitin sulfotransferases that are characteristic components of vertebrate  
18 bone matrices. By Alcian blue-periodic acid Schiff staining (AB-PAS), we found that  
19 the organic matrix extracted from nacreous shells contained large amounts of acidic  
20 GAGs compared with mainly neutral GAGs in prismatic layers of *P. f. martensii* and  
21 *C. gigas* shells. In addition, we detected acid GAGs in secretory cells of the mantle  
22 pallium of *P. f. martensii*, but mainly neutral GAGs in the mantle of *C. gigas* (Fig. 3a).  
23 Further, our data show that the *P. f. martensii* genome has an expanded set of five  
24 types of sulfotransferase (Additional file 1: Table S10), including chondroitin  
25 4-sulfotransferase 11 (CHST11), chondroitin 6-sulfotransferase 3 (CHST3),  
26 carbohydrate 6-sulfotransferase 6 (CHST6), carbohydrate 4-sulfotransferase 9  
27 (CHST9) and dermatan 4-sulfotransferase 1 (D4ST1). Corresponding to large  
28 amounts of acidic GAGs in the mantle pallium, some of the sulfotransferases (*CHST3*,  
29 *CHST11*, *CHST6* and *D4ST1*) exhibited higher expression levels in the mantle pallium  
30 than in the mantle edge (Fig. 3b). *CHST11* and *D4ST1* expressed at the post-veliger  
31 stage, whereas *CHST6* and *CHST3* were mostly up-regulated at the trochophore stage  
32 (Additional file 11: Figure S9a).

1  
2  
3  
4  
5  
6  
7  
8  
9  
10  
11  
12  
13  
14  
15  
16  
17  
18  
19  
20  
21  
22  
23  
24  
25  
26  
27  
28  
29  
30  
31  
32  
33  
34  
**Tyrosinase may participate in the nacre matrix cross-linking.** *C. gigas* has an expanded set of 26 *tyrosinases* (*Tyrs*) [6], and we observed an even larger expansion of *Tyrs* in *P. f. martensii* to 53 genes compared with 3 genes in *L. gigantea*, 1 in humans and 4 in coral (Additional file 1: Table S10). Phylogenetic analysis of these *Tyrs* from *P. f. martensii* and *C. gigas* revealed unbalanced and lineage-specific expansion in both species (Fig. 3c, Additional file 1: Table S14). Their expression profiles in calcifying tissues and at shelled larval stages indicate that 29 of the expanded *P. f. martensii* *Tyrs* may be involved in shell formation, among which 23 were highly expressed after the post-veliger/spat stage, pointing to possible functions in adult shell formation (Fig. 3c). Seven *Tyrs* showed high expression levels in the mantle pallium (MP, Additional file 11: Figure S9b) and 9 *Tyrs* highly expressed in the pearl sac (Additional file 11: Figure S9c), compared with 13 *Tyrs* highly expressed in mantle edge (ME). Twelve *Tyrs* were identified from shell proteome: 2 specific to nacreous layer and highly expressed in MP, 4 specific to prismatic layer and highly expressed in ME and 6 found in both nacreous and prismatic layers. Greater abundance of quinoproteins was observed in the nacreous than in the prismatic layers (Additional file 11: Figure S9d). These results indicate that dopaquinone catalysed by Tyr may be essential for the assembly and maturation of both nacreous and prismatic shell matrices.

35  
36  
37  
38  
39  
40  
41  
42  
43  
44  
45  
46  
47  
48  
49  
50  
51  
52  
53  
54  
55  
56  
57  
58  
59  
60  
61  
62  
63  
64  
65  
**Regulation network of the nacre matrix proteins.** WGCNA of the 234 nacre matrix protein genes revealed 27 hub genes at the centre of the network (Fig. 4, Additional file 8: Datasets S3 and S4), including well-known as well as novel genes for shell formation, such as *fibronectin III*, *VWAP* and *Tyr*, which reinforced our findings and demonstrated the usefulness of WGCNA. In addition, heat shock protein 70 (Hsp70), proteinase inhibitor I2-containing proteins and proteins with chitin-binding domains were also included in the hub genes, indicating their possible roles in nacre formation. Furthermore, we filtered the adjacent coefficients (no less than 0.5) and obtained 3245 crucial genes co-expressed with the nacre matrix proteins. These co-expressed crucial genes were significantly enriched ( $P < 0.05$ ) in the ErbB signalling pathway, the Jak-STAT signalling pathway, the Wnt signalling pathway, osteoclast differentiation signalling pathways, ECM-receptor interactions and the vascular endothelial growth factor (VEGF) signalling pathway, which are all involved in bone formation (Additional file 1: Table S15). Meanwhile, metabolism of polysaccharide such as glycosaminoglycan, N-glycan and O-glycan were also implicated. Analysis by Gene



1  
2  
3  
4  
5  
6  
7  
8  
9  
10  
11  
12  
13  
14  
15  
16  
17  
18  
19  
20  
21  
22  
23  
24  
25  
26  
27  
28  
29  
30  
31  
32  
33  
34  
35  
36  
37  
38  
39  
40  
41  
42  
43  
44  
45  
46  
47  
48  
49  
50  
51  
52  
53  
54  
55  
56  
57  
58  
59  
60  
61  
62  
63  
64  
65

Ontology indicated that genes related to transmembrane transporter activity were significantly enriched, which is consistent with the enrichment of ABC transporters in KEGG analysis (Additional file 1: Table S15, S16).

## 7 8 9 10 11 12 13 14 15 16 17 18 19 20 21 22 23 24 25 26 27 28 29 30 31 32 33 34 35 36 37 38 39 40 41 42 43 44 45 46 47 48 49 50 51 52 53 54 55 56 57 58 59 60 61 62 63 64 65

The assembly of highly polymorphic genomes and gene prediction in non-model organisms remain challenging. Software based on *de Bruijn* Graph, such as SOAP*denovo* [18], is inadequate in producing satisfactory results due to the increased complexity of *de Bruijn* graph structure. Overlap-Layout-Consensus assembler, such as Celera Assembler [19], based on the data of fosmids or BACs hierarchical sequencing and third-generation long reads (such as PacBio long reads) are employed to overcome such problems. However, the best choice for assembling complex genomes is to sample haploid or homozygous sequences. For the *ab initio* gene prediction software, such AUGUSTUS [20], the aim is to find potential coding sequences with sufficiently long open reading frames, but the translated regions may be too short making the absence of stop codons meaningless. The similarity-based approaches including homologous protein sequences, EST sequences and transcripts assembled from RNA-seq reads can produce biologically relevant predictions, but they may not cover all coding exons. Considering their strengths and weaknesses, synthesis software, such as GLEAN [21] and MAKER [22], were used to synthesize these evidences obtained from *ab initio* gene predictions and similarity-based approaches into the final gene annotation. BUSCO [23] analysis indicates our assembly is sufficiently complete.

The aragonite nacre that gives pearls and certain shells their lustre and enhanced toughness is the target of many studies and modelling. According to the matrix model of molluscan shell formation, the mineralization of calcium carbonate is directed by a mantle-secreted organic matrix [24, 25], which is not fully understood but may contain chitin [26-28] and silk fibroin [29-31] for the structural framework and soluble acidic proteins for crystal nucleation [32-34]. Alternatively, the cellular hypothesis argues that biomineralization may be directed by hemocytes [7, 35] although there is no dispute about the involvement of organic matrices which are the focus of our study. Chitin is an ancient macromolecule and the primary framework component of organic matrices in cell walls of fungi and diatoms, sponge skeletons and arthropod shells [3]. It is possible that the chitin component of lophotrochozoan

1 and ecdysozoan shells and of sponge skeletons constitute a shared feature and have  
2 the same ancient origin. Our results provide strong evidence that chitin is the basic  
3 component of *P. f. martensii* shell matrices.  
4

5 While silk proteins, which are also considered as the major components of the  
6 organic matrix in the molluscan shell, were not found in the *P. f. martensii* genome  
7 and the proteome of the nacreous shell matrix, abundant signatures of expanded  
8 VWAPs were detected in the nacre proteome. VWAPs were also reported to be found  
9 in *C. gigas*, *Mytilus edulis* and *Pecten maximus* [36]. The VWA domains are a family  
10 of 200-amino-acid residues and function as interaction modules in many intra- and  
11 extracellular proteins, such as copines, integrins, von Willebrand factor, complement  
12 factors B and C2, matrilins, and collagens [37]. Collagens are a large family of  
13 extracellular matrix proteins with typical THR. Eight of the 28 known collagens  
14 (collagen VI, VII, XII, XIV, XX, XXI, XXII, and XXVIII) contain VWA domains in  
15 addition to THR. The finding that VWAs of VWAPs from shell matrix show the  
16 highest homology with VWAs of vertebrate collagens, suggest that these VWAPs and  
17 vertebrate collagens may have a common origin. It is possible that collagens with  
18 VWAs are evolved from VWAPs through the addition of THR, and VWAPs of *P. f.*  
19 *martensii* represents an ancient form that never acquired THR. It is also possible and  
20 that some of the VWAPs were collagens that lost THR. Collagens with both VWAs  
21 and THR are found in some invertebrates such as *C. teleta*, *H. robusta* and *Mytilus*  
22 *coruscus* [16], but not in *P. f. martensii*, *C. gigas* and *L. gigantea*, which argues for  
23 the loss of THR in some molluscan lineages.  
24  
25  
26  
27  
28  
29  
30  
31  
32  
33  
34  
35  
36  
37  
38  
39

40 THR are crucial for the self-assembly of collagen subunits into triple-helix  
41 protomers and the formation of fibrillar collagens [38, 39]. The absence of THR in  
42 VWAPs indicates that VWAPs may function differently in the nacreous shells of *P. f.*  
43 *martensii* from collagens in bone. VWAPs may not self-assemble into fibrous  
44 structures but instead cross-link with each other and other matrix proteins to form a  
45 network structure [40-42]. The finding of VWAPs with chitin-binding domains further  
46 highlights their function in interacting with the chitin framework during matrix  
47 formation. In addition, VWA domains bind to positive ions that attract water, and may  
48 cooperate with GAGs or other proteins and provide initial hydrogel properties for  
49 biomineralization [37].  
50  
51  
52  
53  
54  
55  
56  
57

58 Mammalian cartilage and bone matrices consist of collagen fibrils and a gel-like  
59 ground substance that is rich in chondroitin-containing proteoglycans, fibronectins  
60  
61

1 and link proteins [43]. Our results confirm the presence of fibronectin-like proteins in  
2 shells of *P. f. martensii* and *C. gigas* [6]. Proteoglycans or GAGs, which have strong  
3 water-binding capabilities and have been detected in the shell [29], may function as  
4 the gel-like substance [44]. In the nacre and the secretory cells of the mantle pallium  
5 of *P. f. martensii*, we found large amounts of acidic GAGs, which have also been  
6 detected in coral [45] and bone [46], and this finding argues that the acidic GAGs  
7 might also play key roles in crystal nucleation during nacre formation. Combining this  
8 finding with the findings of collagen-related VWAPs and other elements shared by  
9 bone formation, our results suggest that the nacreous shell matrix, while having a  
10 chitin-based framework, also possesses key elements of collagen-based matrices, such  
11 as fibronectins, proteoglycans and chondroitin sulfotransferases. Chitin- and  
12 collagen-based matrices are considered as two basic types of biomineralizing  
13 framework, and our results suggest that they may share some basic components and  
14 have a common origin, or might have co-existed as parts of an ancient/ancestral  
15 matrix with dual-elements, despite subsequent divergence in different taxa into chitin-  
16 or collagen-based organic matrices.

17  
18  
19  
20  
21  
22  
23  
24  
25  
26  
27  
28  
29 The shell organic matrix, rather than being a simple self-assembling structure,  
30 might instead be a complex and dynamic matrix that requires active construction,  
31 regulation and remodelling. Tyrs, which can catalyse the formation of dopa and  
32 dopaquinone, were highly abundant in the shell of bivalves, and may function in  
33 mediating intermolecular cross-links [6, 47], or as a structural component of the shell.  
34 Tyrs belong to the "type-3 copper" family and have a conserved active site of six  
35 histidine residues mediating the binding of copper ion as cofactor [48]. Metal ions  
36 such as  $\text{Cu}^{2+}$ ,  $\text{Zn}^{2+}$  and  $\text{Mg}^{2+}$  are important factors for stabilizing the crystalline form  
37 of calcium carbonate [49-51]. Therefore, the deposition of Tyrs and associated metal  
38 ions in the matrix may regulate metal ion concentration in the extrapallial fluid and  
39 help to stabilize the crystalline form. Interestingly, we found that the histidine residues  
40 were retained in the 4 prism-specific Tyrs but mostly lost in the two nacre-specific  
41 Tyrs (Pma\_10005159 and Pma\_10016044), suggesting possible divergence in metal  
42 ion binding capability between nacre-specific and prism-specific Tyrs. It should be  
43 noted that many of expanded Tyrs may be unrelated to shell formation as shell-less  
44 *Octopus bimaculoides* also shows some expansion (Table S10), and instead they may  
45 function in their well-established roles in melanin pigment production, wound healing  
46 and immune responses in *P. f. martensii* also [52].

1 The complexity of the shell matrix and biomineralization processes is further  
2 demonstrated by co-expression network analysis, which indicates that genes related to  
3 polysaccharide metabolism are significantly co-expressed with nacre proteins. This  
4 result is consistent with the abundance of chitin and acid GAGs in the nacreous layer.  
5 Interestingly, nacre proteins were also co-expressed with ABC-transporters known as  
6 ATP-dependent transport proteins. ABC-transporters may mediate the secretion of  
7 proteins without signal peptide [53], which are not uncommon among nacre proteins  
8 and may be also secreted through other mechanisms such as exosomes [6]. Some  
9 nacre proteins without signal peptide may be due to assembly and annotation errors.  
10 More importantly, signal pathway related to bone formation, such as Wnt signalling  
11 pathway and osteoclast differentiation signalling pathway, were also implicated.  
12 Together, these results suggest that molluscan shell formation is an elaborate and  
13 dynamic process that shares certain basic elements with mammalian bone formation,  
14 but with added complexity. Although molluscan shells have a chitin-dominated  
15 framework, the identification of key elements shared by collagen-based matrices  
16 supports a single origin for the two types of matrices or a common set of tools that  
17 may have been lost, modified and reorganized during evolution to produce diverse  
18 forms of biomineralized structures in adaptation to new environments and in  
19 assuming new functions.  
20  
21  
22  
23  
24  
25  
26  
27  
28  
29  
30  
31  
32  
33

34 In conclusion, we sequenced and assembled the highly polymorphic genome of *P. f.*  
35 *martensii* using NGS and the BAC-to-BAC strategy. Based on genomic,  
36 transcriptomic, and proteomic analyses and experimental studies, we identified a large  
37 number of genes related to shell nacre formation, which helped us to re-construct the  
38 shell matrix model (Fig. 5). The identification of collagen-related VWAPs and other  
39 elements of collagen-based matrices in the chitin-rich nacre matrix supports the  
40 homology and single evolutionary origin of the common biomineralization toolkit.  
41 The hypothesis of a single evolutionary origin challenges the prevailing idea of  
42 independent evolution [2] and may stimulate homology-based studies towards a better  
43 understanding of the diverse forms of biomineralization.  
44  
45  
46  
47  
48  
49  
50  
51  
52  
53

## 54 **Methods**

55 **SI Appendix has additional information relating to the methodologies described**  
56 **below.**

57 **Library construction and sequencing.** We constructed all sequencing libraries  
58  
59  
60  
61  
62  
63  
64  
65

1 according to protocols from Illumina and sequenced these libraries on a HiSeq 2000  
2 sequencing system.

3 **Hierarchical BAC-to-BAC assembly strategy.** We used a hierarchical BAC-to-BAC  
4 assembly approach as used for the moth genome [11]. Before the hierarchical  
5 assembly of BACs, we used SOAPdenovo to assemble the reads of each BAC with  
6 odd numbered K-mers from 27 to 63 and selected the best results with the longest  
7 scaffold N50 and total length, as primary scaffolds. Then, we used the paired-end  
8 reads information of the BACs and locally assembled the reads in the gap regions to  
9 fill in the gaps within the primary BAC scaffolds. Our custom assembly software  
10 (Rabbit) [11] was used to assemble scaffolds of BACs with large overlaps. After  
11 finding relationship among sequences, merging overlapping sequences and removing  
12 redundant sequences, we obtained longer segments as secondary scaffolds. Finally,  
13 SSPACE was used to join the secondary scaffolds to form final scaffolds, and  
14 SOAP-Gapcloser was used to fill in the gaps in the final scaffolds using all WGS  
15 reads with short insert sizes.

16 **Linkage group construction.** We constructed a genetic map using RAD-seq of 148  
17 F1 progeny from a family obtained by crossing two genetically distant parents. We  
18 used SOAP2 [54] to map the reads to the reference genome sequences of *P. f.*  
19 *martensii* (scaffolds) and performed SNP calling using SOAPsnp [55]. After SNP  
20 calling, we extracted genotypes by combining all SNPs among the 148 progeny and  
21 the 2 parents and constructed linkage map using JoinMap 4.1 [56].

22 **Phylogenetic tree construction and divergence time estimation.** We used Treefam  
23 to obtain gene families and one-to-one orthologs, and used MrBayes to construct the  
24 phylogenetic tree.

25 **Transcriptome analysis.** We extracted total RNA from each sample and isolated  
26 mRNA using oligo (dT) magnetic beads. Then, the mRNA was fragmented into short  
27 fragments (200~500 bp) for construction of RNA-seq libraries that were sequenced on  
28 an Illumina HiSeq2000. Using SOAP2, all clean reads were mapped to the genome  
29 assembly with less than 5 mismatches. We used the *RPKM* method (Reads per  
30 kilobase transcript per million mapped reads) to calculate the gene expression levels.  
31 We also tested TPM (Transcripts Per Million) [57] for quantifying gene expression  
32 and found excellent correspondence between RPKM and TRM for our samples.

33 **Identification of the matrix proteins.** We used the Mascot software (v 2.3.02) to  
34 query the MS/MS spectra data of matrix proteins in the database. We applied the  
35

1  
2  
3  
4  
5  
6  
7  
8  
9  
10  
11  
12  
13  
14  
15  
16  
17  
18  
19  
20  
21  
22  
23  
24  
25  
26  
27  
28  
29  
30  
31  
32  
33  
34  
35  
36  
37  
38  
39  
40  
41  
42  
43  
44  
45  
46  
47  
48  
49  
50  
51  
52  
53  
54  
55  
56  
57  
58  
59  
60  
61  
62  
63  
64  
65

trypsin cleavage rule with one missed cleavage site. Carbamidomethylation of cysteines was considered as the fixed modifications while Gln->pyro-Glu (N-term Q), Oxidation (M) and Deamidated (NQ) were considered as the variable modifications. Peptide mass tolerance was set to 0.05Da and fragment mass tolerance was set to 0.01Da. We used target-decoy search strategy [58] to identify the matrix proteins, and the False Discovery Rate (PDR) was  $\leq 1\%$ .

**Extraction of matrix proteins from the nacre and prismatic layer.** Shells of freshly collected oysters were thoroughly cleaned by hand and treated with sodium hypochlorite solution (6-14% active chlorine) to remove organic surface contaminants [59]. The prismatic layer was separated from the edges of pearl oyster shells without nacre. The nacre was directly scraped from the internal shell surfaces dominated by aragonite. These samples were thoroughly ground and soaked in acetic acid solution (5%, v/v) for at least 12 h to dissolve calcium carbonate, before being centrifuged at 14,000 g and 4 °C for 1 h. Acid-soluble proteins were in the supernatant, and acid-insoluble proteins were in the residue.

Samples were electrophoresed on 12% polyacrylamide gels and stained with Coomassie blue R-250. The extracted peptides were dried and stored at -80 °C until liquid chromatography/tandem mass spectrometry (LC-MS/MS) analysis.

**Chitin identification in shell matrix.** We decalcified the shells in 1 M acetic acid at 4 °C for one week, and the acid-insoluble material was collected. This insoluble material was washed with distilled water and embedded in paraffin for sectioning. The sections were placed on slides and stained for 5 min with 0.1% Calcofluor White M2R (Flupstain I) (Sigma-Aldrich). Excess dye was rinsed off with distilled water. The stained specimens were observed under a confocal laser microscope using filters with 492 nm excitation and 520 nm emission [60].

**RNAi experiment.** The primers used for generating the *VWAPs* double-strand RNA (dsRNA) are shown in Additional file 1: Table S17. DsRNAs were synthesized following the method of Suzuki et al. [61], and injected into the adductor muscle every 4 days at 100  $\mu\text{g}$  per 100  $\mu\text{l}$  per pearl oyster each time. The effects of RNAi of the six *VWAPs* genes on nacre formation were detected by SEM.

**Identification of GAGs in shell and pearl.** Shells were decalcified in 1 M acetic acid at 4 °C for 1 week and then in 10% EDTA-2Na solution at room temperature for 10 days. The fixed materials were embedded in paraffin and stained with AB/PAS (Alcian blue/periodic acid-Schiff) and observed under a OlympusBX51 optical

microscope.

### **Nitrobluetetrazolium (NBT)/glycinate assay for dopa and dopaquinone protein.**

Sections of decalcified shells were stained with 100  $\mu$ L of solution containing 0.24 mM NBT and 2 M potassium glycinate (pH10) for nearly 5 min in darkness until violet positive signals appeared [62]. The sections were rinsed with double-distilled water to stop the reaction and then mounted for microscopic examination.

**Co-expression network analysis.** We used WGCNA to reconstruct the co-expression network for biomineralization [63]. A weighted correlation network was constructed between all pairs of genes across four mantle tissue samples. The adjacency matrix was calculated through a so-called ‘soft’ thresholding framework (power  $\beta=9$ ) that converted the co-expression measure to a connection weight. Based on the adjacency matrix, we implemented a topological overlap dissimilarity measure to reflect relative inter-connectedness, which may represent a meaningful biological network. Hub genes (highly connected genes), by definition, tend to have high connectivity in the constructed network.

### **Availability of supporting data**

Data from the pearl oyster (*P. f. martensii*) genome projects are available from NCBI BioProject:PRJNA283019. Data supporting the manuscript is also available via the GigaDB database [64].

### **List of abbreviations**

CHS: chitin synthases; VWAP: VWA domain containing protein; BMPs: bone morphogenetic proteins; VWA: von Willebrand factor A; CHST11: chondroitin 4-sulfotransferase 11; CHST3: chondroitin 6-sulfotransferase 3; CHST6: carbohydrate 6-sulfotransferase 6; CHST9: carbohydrate 4-sulfotransferase 9; D4ST1: dermatan 4-sulfotransferase 1; Tyr: Tyrosinase; WGCNA: Weighted-gene co-expression network analysis; ITIH4 : Inter alpha-trypsin inhibitor, heavy chain 4; MATN2/3: Matrilin-2/3; Col12A1: Collagen alpha-1(XII) chain; Col14A1: Collagen alpha-1(XIV) chain; Col22A1: Collagen alpha-1(XXII) chain; Col6A3/4/6: Collagen alpha-3/4/6(VI) chain;

### **Competing interests**

The authors declare that they have no competing interests.

### **Funding**

This research is partly supported the Guangdong Ocean University Nature Science Foundation (University program: Genome studies of pearl oyster), the National

1 Nature Science Foundation of China (31272635, 31372526, 31672626), Modern  
2 Agro-industry Technology Research System (CARS-48), USDA/NJAES Project  
3 1004475/NJ32920 and “Taishan Oversea Scholar” program.  
4

#### 5 **Authors' contributions**

6  
7 X.D., X.G., G.Z. and X.L. designed scientific objectives. Y.J., R.H., W.C., X.X, Q.S.  
8 and G.F. managed the project. H.Z., F.S., X.L., C.S., W.L., H.L. and Z.W. performed  
9 genome assembly, gene annotation and evolution analyses. Y.D., Q.W. and X.Z.  
10 cultured *P. f. martensii* and provided materials. Y.D., Q.W., F.S., J.B. and Z.W.  
11 constructed the genetic map. Q.W., Z.Z., J.L. and R.H. performed the acid GAG  
12 analysis. Y.J., Z.Z., R.H. and J.L. performed chitin and VWAPs related analyses. R.H.,  
13 C.B. and Z.Z. performed tyrosinase related analysis. Z.Z. and H.Z. performed the  
14 WGCNA analysis. X.D., G.F. and X.G. directed final data analyses. Y.J., X.G. and Z.X.  
15 directed critical revisions of intellectual content. X.D., X.G. and Y.J. supervised all  
16 aspects of the work to ensure the accuracy or integrity of the research and data. X.D.,  
17 G.F., Y.J., H.Z., X.G., R.H., Z.Z. did most of the writing with contributions from all  
18 authors.  
19

#### 20 **Acknowledgments**

21 We thank Z. He, W. Liu, Z. Wu, C. Liu, J. Jian, B. Tan for their supports of the pearl  
22 oyster genome project. We thank Y. Guo, X. Chen, M. Xue and Xuwen Pearl Oyster  
23 Farm for assistance with DNA, RNA and protein extraction, data analysis and oyster  
24 culture. We thank L. Goodman for helping to edit the manuscript. We thank other  
25 faculty and staff at Guangdong Ocean University, BGI-Shenzhen and Rutgers who  
26 contributed to the genome project.  
27

#### 28 **Author Information**

29 Correspondence and requests for materials should be addressed to X.D.  
30 (zjdugd@126.com), X.G. (xguo@hsrl.rutgers.edu), G.Z. (gzhang@qdio.ac.cn) and  
31 X.L. (liuxin@genomics.cn).  
32

#### 33 **Reference**

- 34 1. Knoll AH. Biomineralization and evolutionary history. *Rev Mineral Geochem.*  
35 2003;54:329-56.
- 36 2. Drake JL, Mass T, Falkowski PG. The evolution and future of carbonate  
37 precipitation in marine invertebrates: Witnessing extinction or documenting  
38 resilience in the Anthropocene? *Elementa Science of the Anthropocene.*  
39



2014;2:000026.

3. Ehrlich H. Chitin and collagen as universal and alternative templates in biomineralization. *Int Geol Rev.* 2010;52:661-99.
4. Furuhashi T, Schwarzinger C, Miksik I, Smrz M, Beran A. Molluscan shell evolution with review of shell calcification hypothesis. *Comp Biochem Phys B.* 2009;154:351-71.
5. Addadi L, Joester D, Nudelman F, Weiner S. Mollusk shell formation: a source of new concepts for understanding biomineralization processes. *Chem-Eur J.* 2006;12:980-7.
6. Zhang G, Fang X, Guo X, Li L, Luo R, Xu F, et al. The oyster genome reveals stress adaptation and complexity of shell formation. *Nature.* 2012;490:49-54.
7. Mount AS, Wheeler AP, Paradkar RP, Snider D. Hemocyte-mediated shell mineralization in the eastern oyster. *Science.* 2004;304:297-300.
8. Marin F, Luquet G, Marie B, Medakovic D. Molluscan shell proteins: primary structure, origin, and evolution. *Curr Top Dev Biol.* 2007;80:209-76.
9. Murdock DJ, Donoghue PC. Evolutionary origins of animal skeletal biomineralization. *Cells Tissues Organs.* 2011;194:98-102.
10. Takeuchi T, Kawashima T, Koyanagi R, Gyoja F, Tanaka M, Ikuta T, et al. Draft genome of the pearl oyster *Pinctada fucata*: a platform for understanding bivalve biology. *DNA Res.* 2012;19:117-30.
11. You M, Yue Z, He W, Yang X, Yang G, Xie M, et al. A heterozygous moth genome provides insights into herbivory and detoxification. *Nat Genet.* 2013;45:220-5.
12. Murgarella M, Puiu D, Novoa B, Figueras A, Posada D, Canchaya C. A First Insight into the Genome of the Filter-Feeder Mussel *Mytilus galloprovincialis*. *Plos One.* 2016;11:e0151561.
13. Zhang H, Ahmad M, Gronowicz G. Effects of transforming growth factor-beta 1 (TGF- $\beta$ 1) on in vitro mineralization of human osteoblasts on implant materials. *Biomaterials.* 2003;24:2013-20.
14. Miron RJ, Saulacic N, Buser D, Iizuka T, Sculean A. Osteoblast proliferation and differentiation on a barrier membrane in combination with BMP2 and TGF $\beta$ 1. *Clin Oral Invest.* 2013;17:981-8.
15. Yan F, Luo S, Jiao Y, Deng Y, Du X, Huang R, et al. Molecular characterization of the BMP7 gene and its potential role in shell formation in *Pinctada martensii*. *Int J Mol Sci.* 2014;15:21215-28.
16. Qin CL, Pan QD, Qi Q, Fan MH, Sun JJ, Li NN, et al. In-depth proteomic analysis of the byssus from marine mussel *Mytilus coruscus*. *J Proteomics.* 2016;144:87-98.
17. Nudelman F, Shimoni E, Klein E, Rousseau M, Bourrat X, Lopez E, et al. Forming nacreous layer of the shells of the bivalves *Atrina rigida* and *Pinctada margaritifera*: an environmental-and cryo-scanning electron microscopy study. *J Struct Biol.* 2008;162:290-300.
18. Luo R, Liu B, Xie Y, Li Z, Huang W, Yuan J, et al. SOAPdenovo2: an empirically improved memory-efficient short-read de novo assembler.

GigaScience. 2012;1:18.

19. Myers EW, Sutton GG, Delcher AL, Dew IM, Fasulo DP, Flanigan MJ, et al. A whole-genome assembly of *Drosophila*. *Science*. 2000;287:2196.
20. Stanke M, Keller O, Gunduz I, Hayes A, Waack S, Morgenstern B. AUGUSTUS: ab initio prediction of alternative transcripts. *Nucleic Acids Res*. 2006;34:W435-9.
21. Elsik CG, Mackey AJ, Reese JT, Milshina NV, Roos DS, Weinstock GM. Creating a honey bee consensus gene set. *Genome Biol*. 2007;8: R13.
22. Cantarel BL, Korf I, Robb SMC, Parra G, Ross E, Moore B, et al. MAKER: An easy-to-use annotation pipeline designed for emerging model organism genomes. *Genome Res*. 2008;18:188-96.
23. Simão FA, Waterhouse RM, Ioannidis P, Kriventseva EV, Zdobnov EM. BUSCO: assessing genome assembly and annotation completeness with single-copy orthologs. *Bioinformatics*. 2015;31:3210.
24. Addadi L, Weiner S. Biomineralization: A pavement of pearl. *Nature*. 1997;389:912-5.
25. Nassif N, Pinna N, Gehrke N, Antonietti M, Jäger C, Cölfen H. Amorphous layer around aragonite platelets in nacre. *P Natl Acad Sci USA*. 2005;102:12653-5.
26. Levi-Kalisman Y, Falini G, Addadi L, Weiner S. Structure of the nacreous organic matrix of a bivalve mollusk shell examined in the hydrated state using Cryo-TEM. *J Struct Biol*. 2001;135:8-17.
27. Weiss IM, Schönitzer V. The distribution of chitin in larval shells of the bivalve mollusk *Mytilus galloprovincialis*. *J Struct Biol*. 2006;153:264-77.
28. Furuhashi T, Beran A, Blazso M, Czegeny Z, Schwarzingner C, Steiner G. Pyrolysis GC/MS and IR spectroscopy in chitin analysis of molluscan shells. *Biosci Biotech Bioch*. 2009;73:93-103.
29. Pereira- Mouriès L, Almeida MJ, Ribeiro C, Peduzzi J, Barthélémy M, Milet C, et al. Soluble silk- like organic matrix in the nacreous layer of the bivalve *Pinctada maxima*. *Eur J Biochem*. 2002;269:4994-5003.
30. Sudo S, Fujikawa T, Nagakura T, Ohkubo T, Sakaguchi K, Tanaka M, et al. Structures of mollusc shell framework proteins. *Nature*. 1997;387:563-4.
31. Nudelman F, Chen HH, Goldberg HA, Weiner S, Addadi L. Spiers Memorial Lecture Lessons from biomineralization: comparing the growth strategies of mollusc shell prismatic and nacreous layers in *Atrina rigida*. *Faraday discussions*. 2007;136:9-25.
32. Weiner S, Hood L. Soluble protein of the organic matrix of mollusk shells: a potential template for shell formation. *Science*. 1975;190:987-9.
33. Fu G, Valiyaveetil S, Wopenka B, Morse DE. CaCO<sub>3</sub> Biomineralization: Acidic 8-kDa Proteins Isolated from Aragonitic Abalone Shell Nacre Can Specifically Modify Calcite Crystal Morphology. *Biomacromolecules*. 2005;6:1289-98.
34. Evans JS. "Tuning in" to Mollusk Shell Nacre-and Prismatic-Associated Protein Terminal Sequences. Implications for Biomineralization and the

- 1  
2  
3  
4  
5  
6  
7  
8  
9  
10  
11  
12  
13  
14  
15  
16  
17  
18  
19  
20  
21  
22  
23  
24  
25  
26  
27  
28  
29  
30  
31  
32  
33  
34  
35  
36  
37  
38  
39  
40  
41  
42  
43  
44  
45  
46  
47  
48  
49  
50  
51  
52  
53  
54  
55  
56  
57  
58  
59  
60  
61  
62  
63  
64  
65
- Construction of High Performance Inorganic– Organic Composites. Chem Rev. 2008;108:4455-62..
35. Li S, Liu Y, Liu C, Huang J, Zheng G, Xie L, et al. Hemocytes Participate in Calcium Carbonate Crystal Formation, Transportation and Shell Regeneration in the Pearl Oyster *Pinctada fucata*. Fish Shellfish Immun. 2016;51:263-70.
36. Arivalagan J, Yarra T, Marie B, Sleight VA, Duvernoisberthet E, Clark MS, et al. Insights from the Shell Proteome: Biomineralization to Adaptation. Mol Biol Evol. 2016;34:66-77.
37. Whittaker CA, Hynes RO. Distribution and evolution of von Willebrand/integrin A domains: widely dispersed domains with roles in cell adhesion and elsewhere. Mol Biol of cell. 2002;13:3369-87.
38. Kadler KE, Bella BJ, Boot-Handford RP. Collagens at a glance. J Cell Sci. 2007;120:1955-8.
39. Van der Rest M, Garrone R. Collagen family of proteins. The FASEB journal. 1991;5:2814-23.
40. Becker A-KA, Mikolajek H, Paulsson M, Wagener R, Werner JM. A structure of a collagen VI VWA domain displays N and C termini at opposite sides of the protein. Structure. 2014;22:199-208.
41. Fitzgerald J, Mörgelin M, Selan C, Wiberg C, Keene DR, Lamandé SR, et al. The N-terminal N5 subdomain of the  $\alpha 3$  (VI) chain is important for collagen VI microfibril formation. J Biol Chem. 2001;276:187-93.
42. Suhre MH, Gertz M, Steegborn C, Scheibel T. Structural and functional features of a collagen-binding matrix protein from the mussel byssus. Nat Commun. 2014;5:3392.
43. Heinegård D, Oldberg A. Structure and biology of cartilage and bone matrix noncollagenous macromolecules. The FASEB Journal. 1989;3:2042-51.
44. Mow VC, Ratcliffe A, Poole AR. Cartilage and diarthrodial joints as paradigms for hierarchical materials and structures. Biomaterials. 1992;13:67-97.
45. Goldberg WM. Acid polysaccharides in the skeletal matrix and calicoblastic epithelium of the stony coral *Mycetophyllia reesi*. Tissue Cell. 2001;33:376–87.
46. Vejlens L. Glycosaminoglycans of human bone tissue. Calcified tissue research. 1971;7:175-90.
47. Aguilera F, Mcdougall C, Degnan BM. Evolution of the tyrosinase gene family in bivalve molluscs: Independent expansion of the mantle gene repertoire . Acta Biomater. 2014;10:3855-65.
48. Decker H, Schweikardt T, Tuczec F. The first crystal structure of tyrosinase: all questions answered? ChemInform. 2006;45:4546–50.
49. Kitano Y, Kanamori N, Yoshioka S. Adsorption of zinc and copper ions on calcite and aragonite and its influence on the transformation of aragonite to calcite. Geochim J. 1976;10:175-9.
50. Berner R. The role of magnesium in the crystal growth of calcite and aragonite from sea water. Geochim Cosmochim Ac. 1975;39:489-504.

- 1  
2  
3  
4  
5  
6  
7  
8  
9  
10  
11  
12  
13  
14  
15  
16  
17  
18  
19  
20  
21  
22  
23  
24  
25  
26  
27  
28  
29  
30  
31  
32  
33  
34  
35  
36  
37  
38  
39  
40  
41  
42  
43  
44  
45  
46  
47  
48  
49  
50  
51  
52  
53
51. Nassrallah-Aboukais N, Boughriet A, Laureyns J, Aboukais A, Fischer J, Langelin H, et al. Transformation of vaterite into cubic calcite in the presence of copper (II) species. *Chem Mate.* 1998;10:238-43.
  52. Kanteev M, Goldfeder M, Fishman A. Structure–function correlations in tyrosinases. *Protein Sci.* 2015;24:1360-9.
  53. Higgins CF. ABC transporters: from microorganisms to man. *Annu Rev Cell Bio.* 1992;8:67-113.
  54. Hecker A, Mikulski Z, Lips KS, Pfeil U, Zakrzewicz A, Wilker S, et al. Pivotal Advance: Up-regulation of acetylcholine synthesis and paracrine cholinergic signaling in intravascular transplant leukocytes during rejection of rat renal allografts. *J Leukoc Biol.* 2009;86:13-22.
  55. Li R, Li Y, Fang X, Yang H, Wang J, Kristiansen K, et al. SNP detection for massively parallel whole-genome resequencing. *Genome Res.* 2009;19:1124-32.
  56. Van Ooijen J. Multipoint maximum likelihood mapping in a full-sib family of an outbreeding species. *Genet Res.* 2011;93:343-9.
  57. Wagner GP, Kin K, Lynch VJ. Measurement of mRNA abundance using RNA-seq data: RPKM measure is inconsistent among samples. *Theory Biosci.* 2012;131:281-5.
  58. Elias JE, Gygi SP. Target-decoy search strategy for increased confidence in large-scale protein identifications by mass spectrometry. *Nat methods.* 2007;4:207-14.
  59. Mann K, Edsinger-Gonzales E, Mann M. In-depth proteomic analysis of a mollusc shell: acid-soluble and acid-insoluble matrix of the limpet *Lottia gigantea*. *Proteome Sci.* 2012;10:1.
  60. Su X, Matthay MA, Malik AB. Requisite role of the cholinergic  $\alpha 7$  nicotinic acetylcholine receptor pathway in suppressing gram-negative sepsis-induced acute lung inflammatory injury. *J immunol.* 2010;184:401-10.
  61. Suzuki M, Saruwatari K, Kogure T, Yamamoto Y, Nishimura T, Kato T, et al. An acidic matrix protein, Pif, is a key macromolecule for nacre formation. *Science.* 2009;325:1388-90.
  62. Paz MA, Flückiger R, Boak A, Kagan HM, Gallop PM. Specific detection of quinoproteins by redox-cycling staining. *J Bio Chem.* 1991;266:689-92.
  63. Langfelder P, Horvath S. WGCNA: an R package for weighted correlation network analysis. *BMC bioinformatics.* 2008;9:1.
  64. Xiaodong Du, Guangyi Fan, He Zhang, Yu Jiao, Ximing Guo, Ronglian Huang, et al. Supporting data for " The pearl oyster *Pinctada fucata martensii* genome and multi-omic analyses provide insights into biomineralization ". GigaScience Database. 2017. <http://dx.doi.org/xxxxxxx>.

## Figure legend

### Figure 1. Genome organization of *P. f. martensii*.

a. Genetic map of *P. f. martensii* constructed with RAD single-nucleotide polymorphisms (SNPs). The lines on linkage groups represent SNP positions. b. The

1 distribution of GC, gene, repetitive elements and SNPs on *P. f. martensii*  
2 pseudochromosomes. **c.** Synteny blocks between *C. gigas* (Cg) and *P. f. martensii*  
3 (PIN).  
4

5 **Figure 2. Expression and functional analysis of VWAPs in *P. f. martensii*.**  
6

7 **a.** Number of VWAPs and THR-containing proteins in different species. *P. f.*  
8 *martensii* (Pma), *C. gigas* (Cgi), *L. gigantea* (Lgi), *O. bimaculoides* (Obi), *C. teleta*  
9 (Cte), *H. robusta* (Hro), *H. sapiens* (Hsa) and *D. rerio* (Dre). **b.** Expression of 10  
10 genes encoding VWAPs from nacreous shell matrix showing higher expression in the  
11 mantle pallium (MP) and pearl sac (PS) than in other organs. Y-axis is the normalized  
12 RPKM value. X-axis represents nine organs (MP, mantle pallium; ME, mantle edge;  
13 A, adductor muscle; He, hepatopancreas; BC, hemocyte; Go, gonad; Gi, gill; F, foot;  
14 PS, pearl sac at 180 days after nucleus transplantation). **c.** Expression pattern of the 10  
15 VWAPs during early development and the homology of their VWA domains to that  
16 from human and mouse proteins. E, egg; Fe, fertilization; B, blastula; G, gastrula; ET,  
17 early trochophore; T, trochophore; D, D-larvae; DF, D-shaped larvae before feeding;  
18 EU, early umbo larvae; U, eye-larvae; PV, post-veliger; J, juveniles. **d.** Expression of  
19 *Pma\_10015641* and *Pma\_44.543* and nacre growth after RNA interference. Left:  
20 Relative expression of *Pma\_10015641* and *Pma\_44.534* in mantle after RNAi; PBS,  
21 control; RPF, red fluorescent protein; dsRNA, RNAi. Right: Disordered  
22 microstructure of nacre observed after inhibition of the two VWAP genes (bar = 5µm).  
23 col, collagen; ITIH4, Inter-alpha-trypsin inhibitor heavy chain H4; MATR, Matrilin.  
24  
25  
26  
27  
28  
29  
30  
31  
32  
33  
34  
35  
36  
37

38 **Figure 3. GAGs and tyrosinase genes in *P. f. martensii*.**  
39

40 **a.** The shell matrix extracted from the nacre of *P. f. martensii* contains abundant acid  
41 glycosaminoglycans (GAGs) stained blue (I), whereas matrices extracted from the  
42 prismatic layer of *P. f. martensii* (I) and *C. gigas* (II) contain neutral GAGs stained  
43 red. Secretory cells (arrow) in the mantle pallium of *P. f. martensii* are filled with acid  
44 GAGs stained blue (III), whereas cells in the mantle pallium of *C. gigas* contains  
45 neutral GAGs stained red (IV). **b.** Expression (y-axis) of *CHST3*, *CHST11*, *CHST6*  
46 and *D4ST1* genes in the mantle pallium (MP) and the mantle edge (ME). **c.**  
47 Phylogenetic tree of the tyrosinase proteins from *P. f. martensii* and *C. gigas*.  
48 Tyrosinase genes specifically expanded in *P. f. martensii* are shaded in purple, and  
49 their expression patterns during early development are presented in the heat map. E,  
50 egg; Fe, fertilization; B, blastula; G, gastrula; ET, early trochophore; T, trochophore;  
51  
52  
53  
54  
55  
56  
57  
58  
59  
60  
61  
62  
63  
64  
65

1 D, D-shaped larvae; DF, D-larvae before feeding; EU, early umbo larvae; U,  
2 eye-larvae; PV, post-veliger; J, juveniles.

3 **Figure 4. Co-expression network of nacre formation-related genes of *P. f.***  
4 ***martensii*.**

5  
6  
7 Hub genes are illustrated in the internal circle, where connections among them are  
8 coloured red. The number of visible links for each hub gene is represented by the size  
9 of the node. Links and their corresponding hub genes are in the same colour.

10  
11  
12 **Figure 5. A model of nacre formation in *P. f. martensii*.**

13  
14 In this model, new nacre (N) is formed in an organic matrix secreted by haemocytes  
15 or epithelial (Ep) cells beneath the mature nacre (M). Chitin provides the core of the  
16 polymer framework of the organic matrix. VWAP with chitin-binding domains binds  
17 to chitin and interacts with fibronectins and other VWAPs, forming the matrix  
18 networks. Asp-rich acid glycoproteins and acid GAGs function as the hydrogel  
19 substances. Tyrs catalyse the oxidation of tyrosine and dopamine and function in  
20 cross-linking and shell matrix maturation. Protease inhibitors, proteases and other  
21 enzymes regulate the biosynthesis or degradation of the organic matrix.

22  
23  
24 **Additional file 1: methods and related tables**

25  
26  
27 **Additional file 2: Figure S1. Sequencing date and k-mer analysis.**

28  
29 **a.** The distribution of 17-mer depth derived from WGS sequence reads. X-axis is the  
30 K-mer depth and the Y-axis is the percentage of each K-mer depth. The first peak is  
31 created by sequence polymorphism and its relative height provides a measure of  
32 heterozygosity in the diploid genome. **b.** The heterozygous ratio of oyster genome  
33 estimated by k-mer analysis (left). The sequencing depth obtained by WGS reads  
34 mapped against assembly and GC content of our genome (right). **c.** The assembled  
35 length of the BACs of four pooling libraries. Four libraries were randomly selected  
36 and the total length of each assembly was calculated.

37  
38  
39 **Additional file 3: Figure S2. Assembly coverage of BACs.**

40  
41  
42 Sequencing depth on the BACs was calculated by mapped sequence reads. The  
43 annotated transposable elements (TEs) are shown in black or red, and the remaining  
44 unclosed gaps on the scaffolds are marked as white blocks.

45  
46  
47 **Additional file 4: Figure S3. Codon usage and GC content analyses**

48  
49 **a.** Comparison of the distribution of codon usage among 9 species. ACAL, *Aplysia*  
50 *californica*; CGIG, *C. gigas*; CTEL, *C. teleta*; DRER, *D. rerio*; HROB, *H. robusta*;  
51 HSAP, *H. sapiens*; LGIG, *L. gigantea*; OBIM, *O. bimaculoides*; PMAR, *P. f.*

1 *martensii*. **b.** The GC content distribution for each codon position. **c.** The GC content  
2 distribution of exon, intron and inter-genetic regions.

3 **Additional file 5: Figure S4. Phylogenetic analysis and gene clustering.**

4 **a.** Species tree of *P. f. martensii* and 6 selected species. The number is the divergence  
5 time of the clades with ranges in parenthesis. **b.** Unique and shared gene families  
6 between *P. f. martensii* (*P. mar*) and other three species including *Crassostrea gigas*  
7 (*C. gig*), *Lottia gigantea* (*L. gig*) and *Homo sapiens* (*H. sap*).

8 **Additional file 6: Figure S5. Phylogenetic analysis of TGF- $\beta$ 1/2/3 and bone**  
9 **morphogenetic proteins (BMP) from different species.**

10 Proteins and accession numbers are listed in *SI Appendix*, Table S12.

11 **Additional file 7: Figure S6. CHS and chitinase genes in *P. f. martensii*.**

12 **a.** Chitin in the shell matrix of *P. f. martensii* and *C. gigas* stained green with  
13 Calcofluor White M2R. **b.** Expression of *CHS* in different organs. One *CHS*  
14 (*Pma\_10008435*) is highly expressed in both the mantle pallium and the pearl sac. **c.**  
15 Expression of *chitinase* in mantle pallium (MP), mantle edge (ME) and in pearl sac  
16 (PS), compared with non-calcifying tissues (including A, adductor muscle; He,  
17 hepatopancreas; BC, hemocyte; Go, gonad; Gi, gill; F, foot). **d.** Expression of  
18 *Chitinases* and *CHS* at different developmental stages of *P. f. martensii*. Most of the  
19 *chitinases* are highly expressed at T and PV stages. The expression of one *CHS*  
20 (*Pma\_10008435*), which is highly expressed both in mantle pallium and pearl sac, is  
21 also induced at T and PV stages. E, egg; Fe, fertilization; B, blastula; G, gastrula; ET,  
22 early trochophore; T, trochophore; D, D-shaped larvae; DF, D-larvae before feeding;  
23 EU, early umbo larvae; U, eye-larvae; PV, post-veliger; J, juveniles.

24 **Additional file 9: Figure S7. RNAi analysis of four VWAPs in *P. f. martensii*.**

25 Suppression of four VWAPs with RNAi. The expression profiles of four VWAP genes  
26 in the mantle, *Pma\_530.149*, *Pma\_10019835*, *Pma\_10019836* and *Pma\_1011175*,  
27 were determined using real-time quantitative PCR, with GAPDH as the internal  
28 reference gene. VWAPs were significantly inhibited in the treatment group ( $P < 0.05$ ).  
29 SEM images of the surface of the nacre from *P. f. martensii* injected with PBS and  
30 100  $\mu$ g RFP (red fluorescent protein) dsRNA demonstrated a normal growth status of  
31 nacre formation, whereas *P. f. martensii* in the treatment group injected with  
32 *Pma\_530.149*, *Pma\_10019835*, *Pma\_10019836* and *Pma\_10011175* dsRNA showed  
33 disruptions in crystal growth during nacre formation.

34 **Additional file 10: Figure S8. Domain structure of collagens containing both**

**VWA and THR in *C. teleta* (Cte), *H. robusta* (Hro) and *M. coruscus* (Mco).**

The accession number: a. ELU11155.1; b. ELT92434.1; c. WP\_021368082.1; d. XP\_009018142.1; e. XP\_009024759.1; f. ALA16011.1.

**Additional file 11: Figure S9. Tyrosinases and sulfotransferases in *P. f. martensii*.**

**a.** Expression of *sulfotransferase* genes in early development. *CHST11* (Pma\_133.4) and *D4ST1* (Pma\_10006752) showed expression at the PV stage, whereas *CHST6* (Pma\_279.110) and *CHST3* (Pma\_10022575) were mostly up-regulated at the T stage. E, egg; Fe, fertilization; B, blastula; G, gastrula; ET, early trochophore; T, trochophore; D, D-shaped larvae; DF, D-larvae before feeding; EU, early umbo larvae; U, eye-larvae; PV, post-veliger; J, juveniles. **b, c.** *Tyrs* expression in the mantle and pearl sac, respectively, compared with other non-calcifying tissues (including A, adductor muscle; He, hepatopancreas; BC, hemocyte; Go, gonad; Gi, gill; F, foot). *Tyrs* that were highly expressed in mantle pallium (MP) or mantle edge (ME) are shown in b, the different cycles represent different *Tyrs* (inside-out: Pma\_10005159, Pma\_10013533, Pma\_10015392, Pma\_10016044, Pma\_10021421, Pma\_10021422, Pma\_10022578, Pma\_10001525, Pma\_10004452, Pma\_10005803, Pma\_10013532, Pma\_10014430, Pma\_10015306, Pma\_10018719, Pma\_10018775, Pma\_10021425, Pma\_10024726, Pma\_10028201, Pma\_10028307, Pma\_10028311). Expression of *Tyrs* in pearl sac (PS) compared with other non-calcifying tissues are presented in c, with nine *Tyrs* highly expressed in PS marked with red frame. **d.** Abundance of quinoproteins (stained purple) in the nacre matrix revealed by a NBT/glycinate assay. Triangle represented prismatic layer and arrows represented nacreous layer.



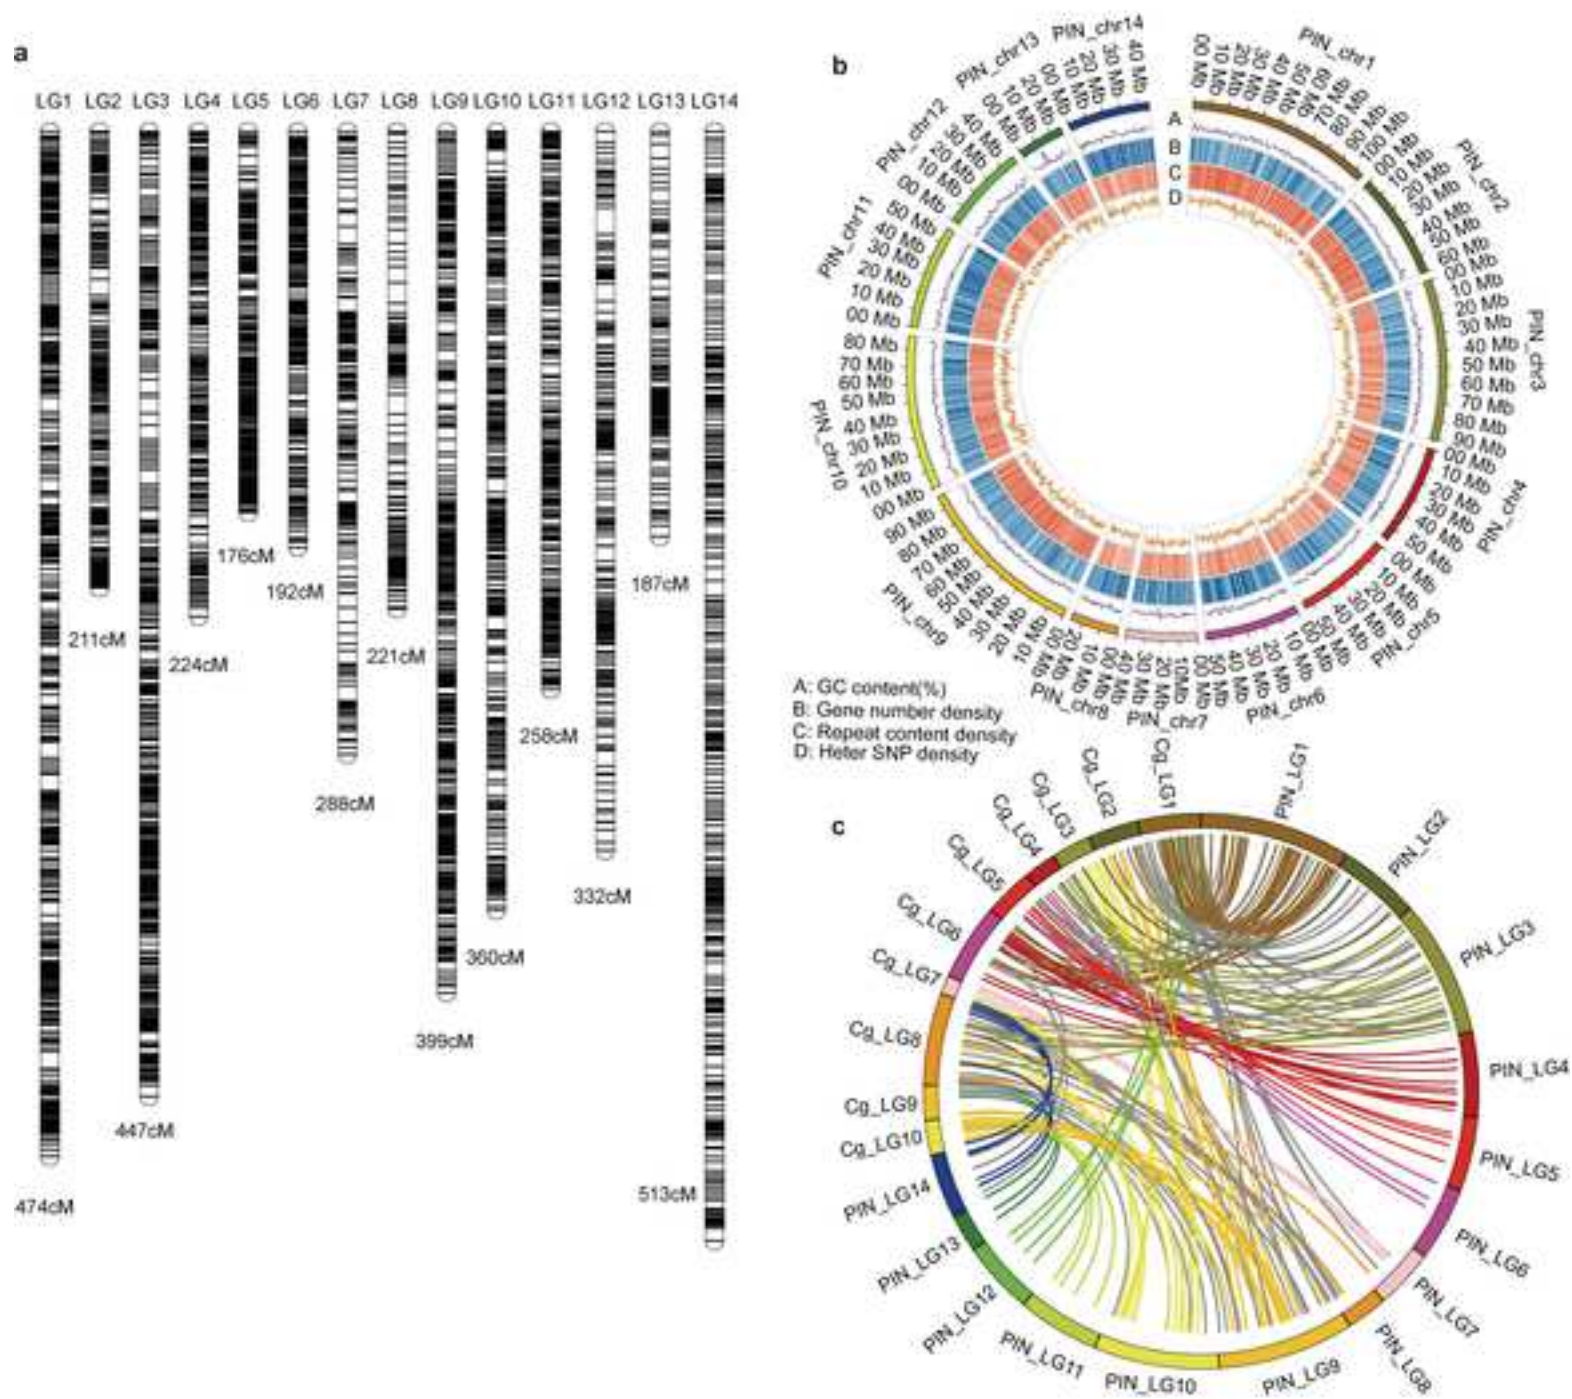

**Figure 2**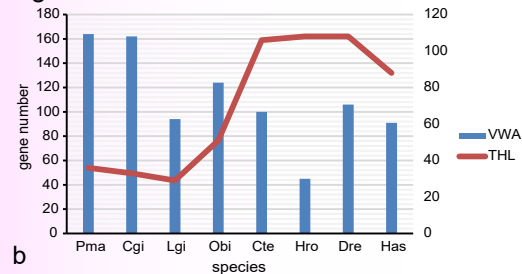**b**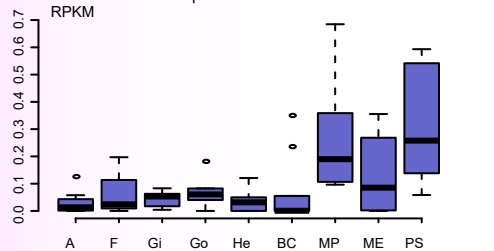**d**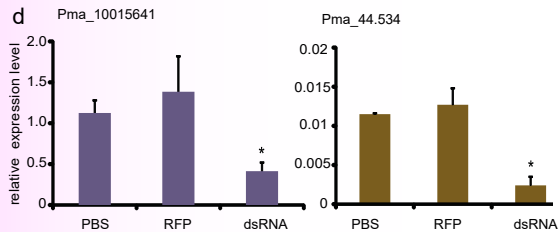**c**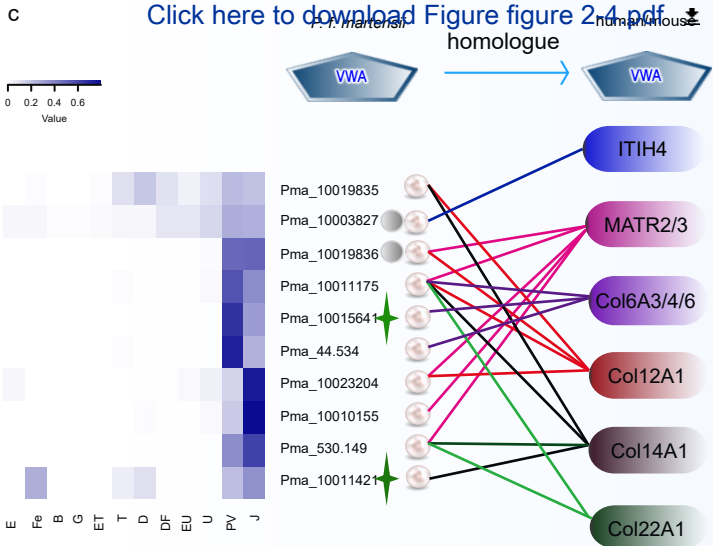

[Click here to download Figure figure 2-4.pdf](#)

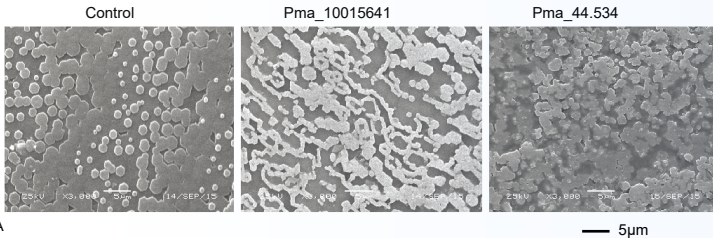





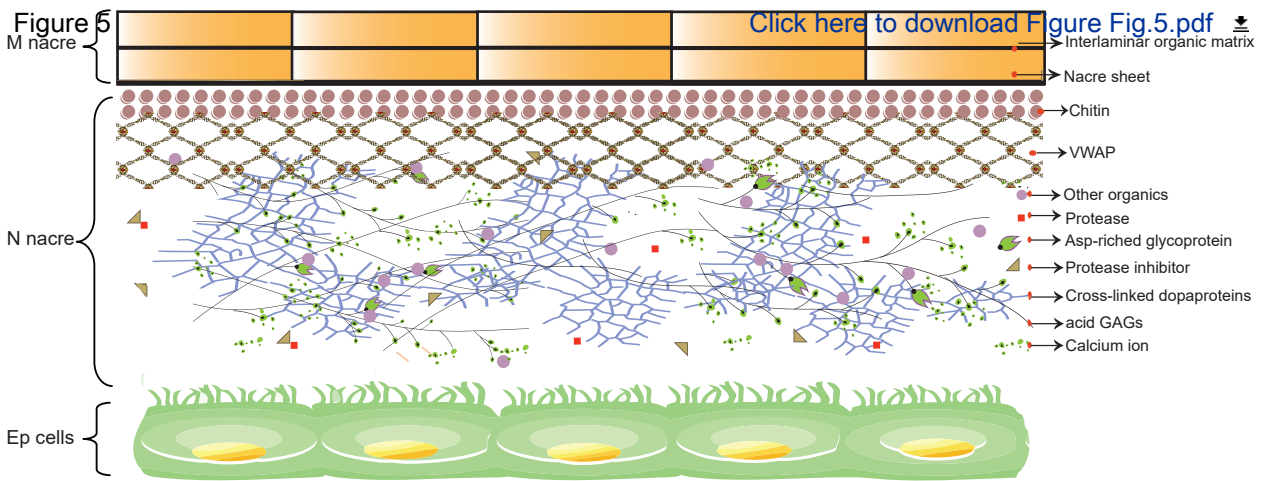

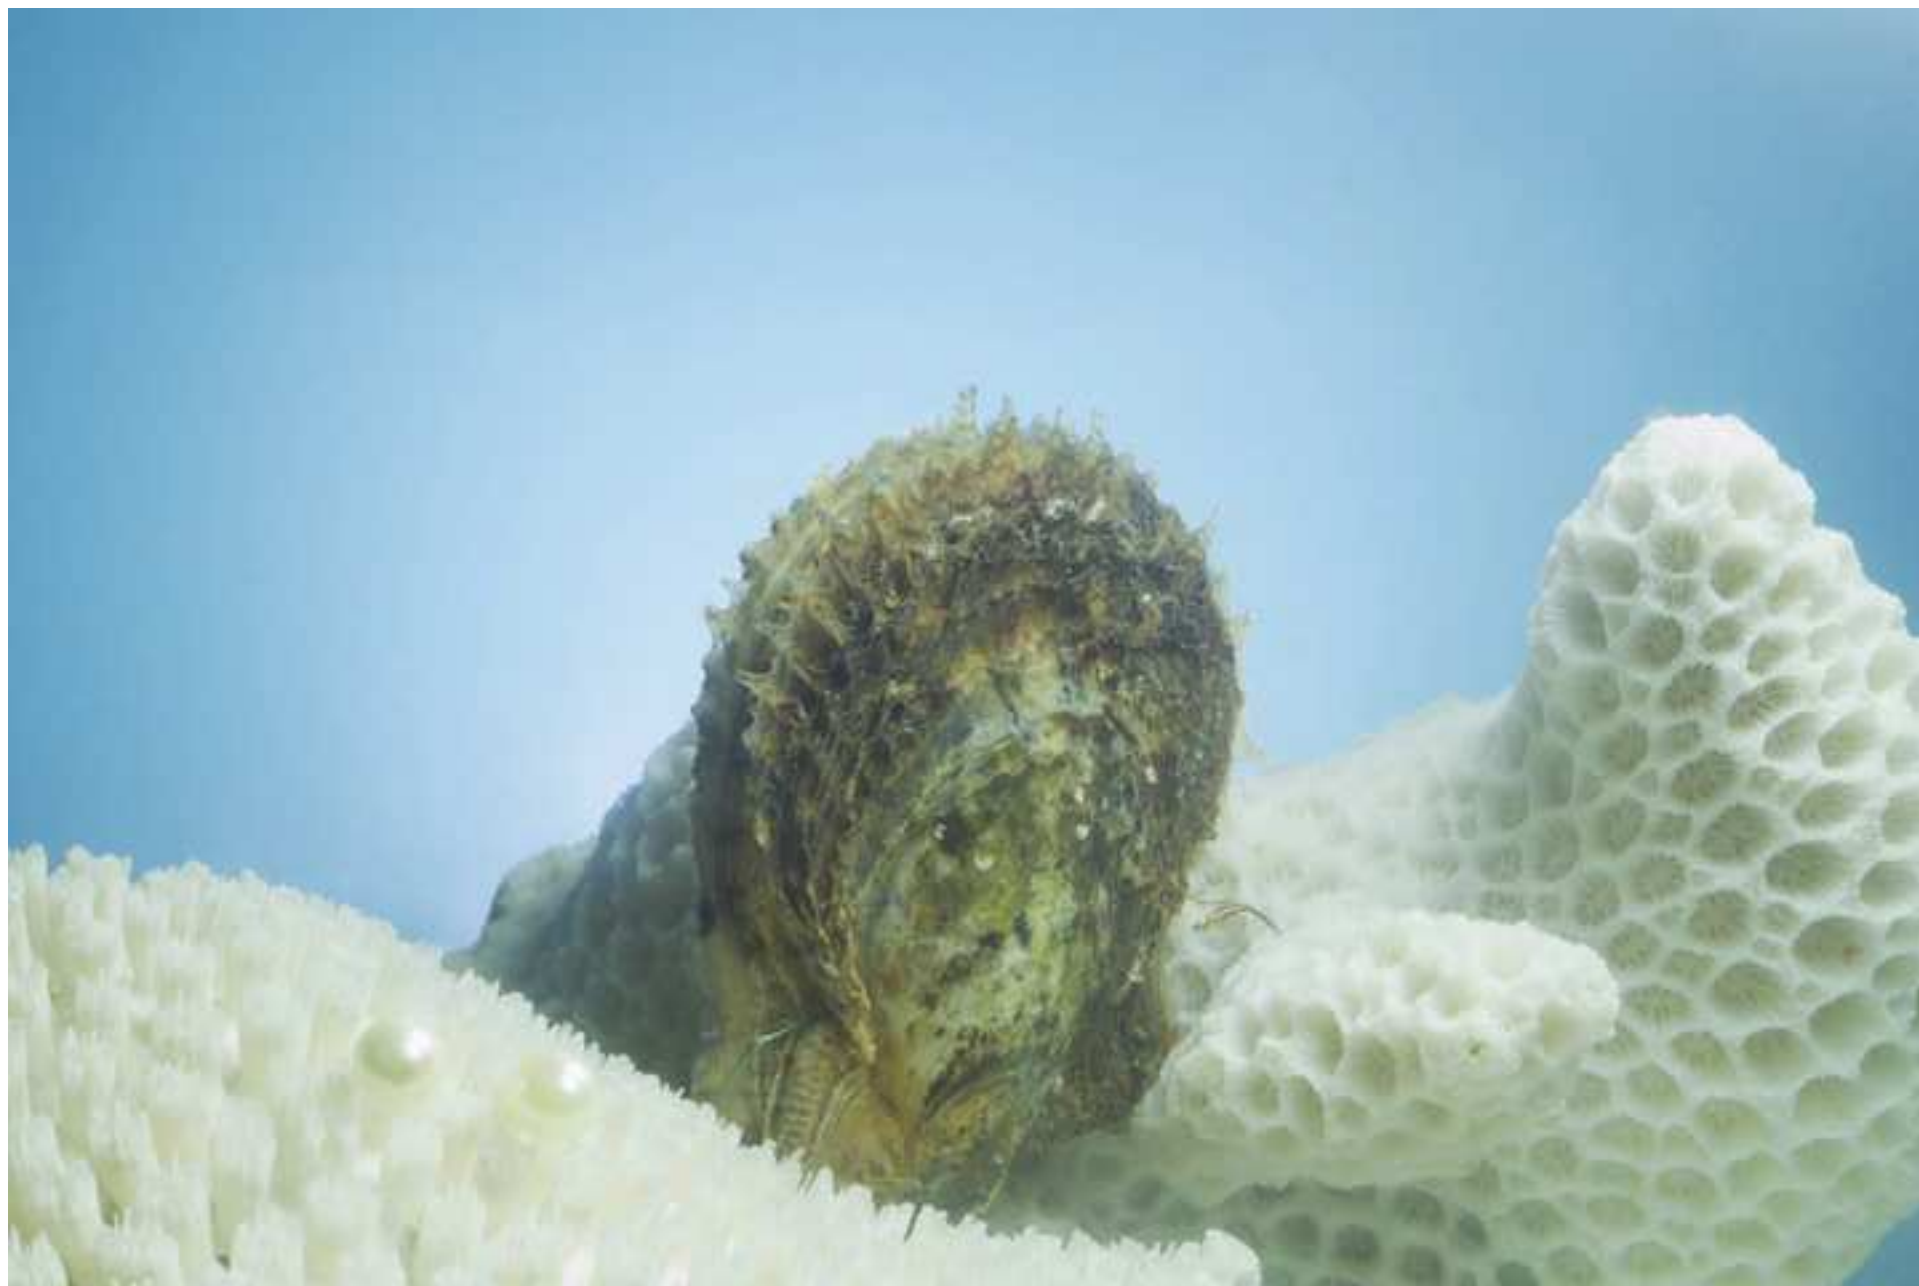

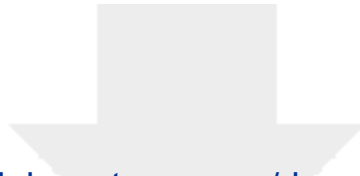

[Click here to access/download](#)

**Supplementary Material**

Additional file 1-0405 XG-0523 (1).docx

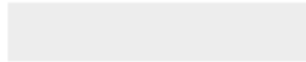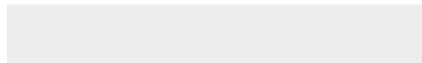

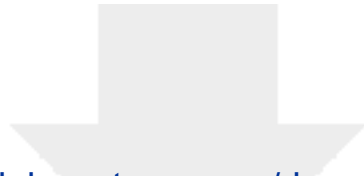

Click here to access/download  
**Supplementary Material**  
Additional file 2.figure S1.tif

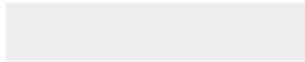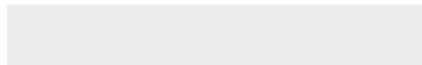





Click here to access/download  
**Supplementary Material**  
Additional file 3.figure S2.tif





Click here to access/download  
**Supplementary Material**  
Additional file 4.figure S3.tif

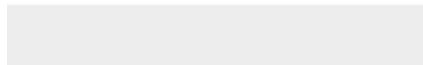



Click here to access/download  
**Supplementary Material**  
Additional file 5.figure S4.tif



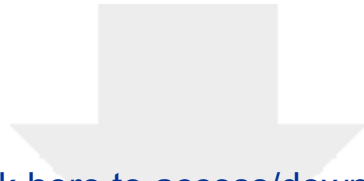

Click here to access/download  
**Supplementary Material**  
Additional file 6.figure S5.tif

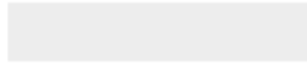

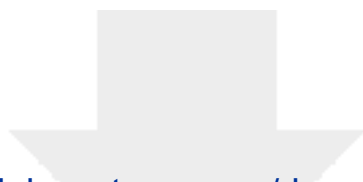

Click here to access/download  
**Supplementary Material**  
Additional file7.figure S6-070106.tif

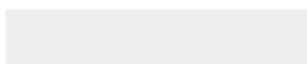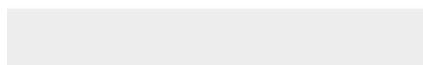



Click here to access/download  
**Supplementary Material**  
Additional file 8-0405.xlsx

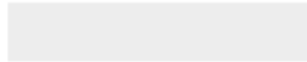



Click here to access/download  
**Supplementary Material**  
Additional file9. figure S7-01.tif





Click here to access/download  
**Supplementary Material**  
Additional file 10 Figure S8.pdf





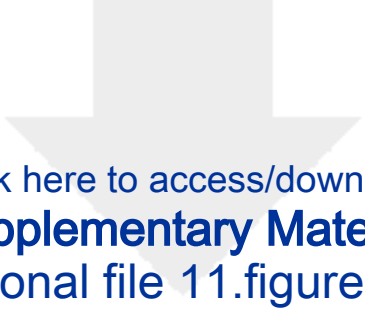

Click here to access/download  
**Supplementary Material**  
Additional file 11.figure S9.tif

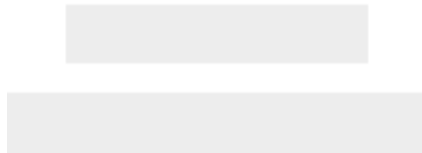

Dear Dr. Zauner,

Thank you for the comments and suggestions. We have carefully revised our manuscript accordingly. A point-to-point response is provided below. We hope the revised manuscript is now acceptable for publication in GigaScience. Please feel free to contact me if you have any questions. We look forward to hearing from you soon.

Sincerely yours,

Xiaodong Du

### **Point-to-point responses**

- Please re-consider the number of joint first authors. We notice you have 11 joint first authors. It does not seem feasible that every single author has done exactly the same amount of work. You can provide information on everyone's roles in the appropriate section at the end of the paper, so people are aware who did what. Please make sure you follow our criteria for authorship. This is based on definitions from International Committee of Medical Journal Editors and Committee on Publication Ethics, authorship is about responsibility and credit for making an intellectual contribution to the study. Acquisition of funding, collection of data, or general supervision of the research group, alone, does not justify authorship. I have pasted excerpts from our guidelines before.

Authors: Thank you for the comment. After discussions among our team, we decide to retain the following seven first authors: Xiaodong Du, Guangyi Fan, Yu Jiao, He Zhang, Ximing Guo, Ronglian Huang and Zhe Zheng. We feel contributions from these seven authors are equally important. The following is a brief summary of author contributions that is added to the revised ms:

X.D., X.G., G.Z. and X.L. designed scientific objectives. Y.J., R.H., W.C., X.X, Q.S. and G.F. managed the project. H.Z., F.S., X.L., C.S., W.L., H.L. and Z.W. performed genome assembly, gene annotation and evolution analyses. Y.D., Q.W. and X.Z. cultured *P. f. martensii* and provided materials. Y.D., Q.W., F.S., J.B. and Z.W. constructed the genetic map. Q.W., Z.Z., J.L. and R.H. performed the acid GAG analysis. Y.J., Z.Z., R.H. and J.L. performed chitin and VWAPs related analyses. R.H., C.B. and Z.Z. performed tyrosinase related analysis. Z.Z. and H.Z. performed the WGCNA analysis. X.D., G.F. and X.G. directed final data analyses. Y.J., X.G. and Z.X. directed critical revisions of intellectual content. X.D., X.G. and Y.J. supervised all aspects of the work to ensure the accuracy or integrity of the research and data. X.D., G.F., Y.J., H.Z., X.G., R.H., Z.Z. did most of the writing with contributions from all authors.

- We also note that you indicate four corresponding authors. OUP has a policy of only taking one - most responsive - author as corresponding author. Please note that, according to the guidelines, the definition of corresponding authorship is one of

responsiveness rather than seniority. The corresponding author is the one individual who takes primary responsibility for communication with the journal during the manuscript submission, peer review, and publication process. Again, please refer to the information below and on our homepage and please decide based on these guidelines who should be corresponding author.

Authors: Thank you for the suggestion. We see that the OUP's policy was adopted starting January 1, 2017. Our article was submitted in 2016. The four corresponding authors did a lot of work and contributed significantly to the correspondence related to this manuscript. They represent four principle institutions that jointly led the project. We hope we could keep the four corresponding authors. Thank you for your understanding.

- Please add all relevant accession numbers to your manuscript (such as NCBI, PRIDE) and make sure the data are released and accessible. (If the PRIDE submission is a full submission, please cite the DOI. If it's a partial submission, add the accession.)

Authors: All relevant accession numbers were added to the revised paper.

- We recommend to mention the common name of the species in the title, in addition to the scientific name.

Authors: Thank you for the recommendation. The title was modified as "The pearl oyster *Pinctada fucata martensii* genome and multi-omic analyses provide insights into biomineralization".

- Please mention the GigaDB dataset in your data availability section, using the following format: "Data supporting the manuscript is also available via the GigaDB database [64]" and please add the citation of the GigaDB dataset to your reference list, using this format as template:

(this is just an example): Zheng L-Y, Guo X-S, He B, Sun L-J, Peng Y, Dong S-S, et al. Supporting data for "Title of your paper". GigaScience Database. 2017. <http://dx.doi.org/xxxxxxxxx>.

(If you do not have your final GigaDB DOI yet, just put XXX instead of the doi, and we'll add this for you)

Authors: Thanks. We have added the citation in reference list in this article.

- please remove highlighting/tracking of changes that was made for the purpose of review only.

Authors: Thanks. Highlighting/tracking of changes were removed.

- If you wish and it is available, please feel free to add a photograph of the oyster species as a Figure to the paper.

Authors: Thanks. We have prepared a picture of pearl oyster *P. f. martensii* as a Figure (figure 6) to the paper and submitted in the submission system.
